# Supplementary material
Source: Springer Nature journal article supplement (https://www.springermedizin.de/resource/supplementary/12963_2011_152_MOESM4_ESM.pdf/9572768)

HCE No HCE

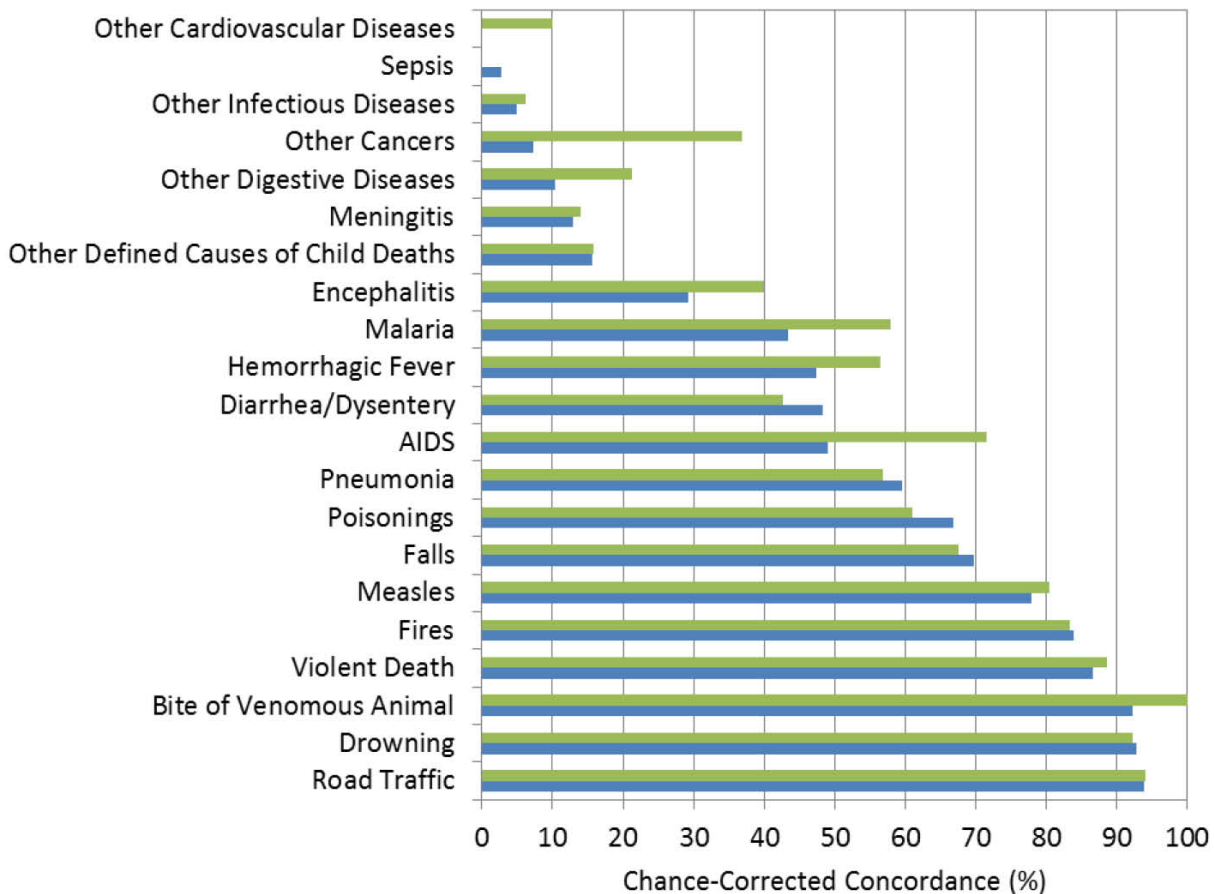

Supplement: MOESM4 [file 9572768]
